# Supplementary material
Source: PubMed Central journal article supplement (PMC7870005)
Supplement: NIHMS1653374-supplement-316738_Major_Resources_Table.pdf [file NIHMS1653374-supplement-316738_Major_Resources_Table.pdf]

## Major Resources Table

In order to allow validation and replication of experiments, all essential research materials listed in the Methods should be included in the Major Resources Table below. Authors are encouraged to use public repositories for protocols, data, code, and other materials and provide persistent identifiers and/or links to repositories when available. Authors may add or delete rows as needed.

### Animals (in vivo studies)

| Species             | Vendor or Source | Background Strain | Sex | Persistent ID / URL                                                               |
|---------------------|------------------|-------------------|-----|-----------------------------------------------------------------------------------|
| <b>Mus musculus</b> | Jackson lab      | C57BL/6           | M   | <a href="https://www.jax.org/strain/000664">https://www.jax.org/strain/000664</a> |
|                     |                  |                   |     |                                                                                   |
|                     |                  |                   |     |                                                                                   |

### Genetically Modified Animals

|                 | Species      | Vendor or Source             | Background Strain | Other Information                                           | Persistent ID / URL                                                                                                                                                                                                  |
|-----------------|--------------|------------------------------|-------------------|-------------------------------------------------------------|----------------------------------------------------------------------------------------------------------------------------------------------------------------------------------------------------------------------|
| Parent - Male   | Mus musculus | Jackson Labs                 | FVB/NJ            | FOXO1 <sup>fl/fl</sup>                                      | <a href="https://www.jax.org/strain/024756">https://www.jax.org/strain/024756</a>                                                                                                                                    |
| Parent - Female | Mus Musculus | Jackson Labs                 | C57BL/6           | aMHC-Cre                                                    | <a href="https://www.jax.org/strain/011038">https://www.jax.org/strain/011038</a>                                                                                                                                    |
|                 | Mus musculus | Jackson Labs                 | C57BL/6           | <i>Ppara</i> <sup>-/-</sup>                                 | <a href="https://www.jax.org/strain/008154">https://www.jax.org/strain/008154</a>                                                                                                                                    |
|                 | Mus musculus | Provided by Dr. Whitsett JA* | FVB/N             | *KLF5 <sup>fl/fl</sup><br># <i>aMHC-Klf5</i> <sup>-/-</sup> | * <a href="https://dev.biologists.org/content/135/15/2563">https://dev.biologists.org/content/135/15/2563</a><br># <a href="https://pubmed.ncbi.nlm.nih.gov/26574507/">https://pubmed.ncbi.nlm.nih.gov/26574507/</a> |
| Parent - Male   | Mus musculus | Provided by Dr. Whitsett JA* |                   | R26-Isi-rtTA-TRE-Klf5                                       | <a href="https://dev.biologists.org/content/137/23/3953">https://dev.biologists.org/content/137/23/3953</a>                                                                                                          |
| Parent - Female | Mus Musculus | Jackson Labs                 | C57BL/6           | aMHC-Cre                                                    | <a href="https://www.jax.org/strain/011038">https://www.jax.org/strain/011038</a>                                                                                                                                    |

### Antibodies

| Target antigen           | Vendor or Source | Catalog # | Working concentration | Persistent ID / URL                                                                                                                                                                                                                   |
|--------------------------|------------------|-----------|-----------------------|---------------------------------------------------------------------------------------------------------------------------------------------------------------------------------------------------------------------------------------|
| <b>KLF5</b>              | Millipore        | 07-1580   | 1:1000                | <a href="https://www.emdmillipore.com/US/en/product/msds/MM_NF-07-1580">https://www.emdmillipore.com/US/en/product/msds/MM_NF-07-1580</a>                                                                                             |
| <b>KLF5</b>              | Abcam            | ab137676  | 1:1000                | <a href="https://www.abcam.com/klf5-antibody-ab137676.html">https://www.abcam.com/klf5-antibody-ab137676.html</a>                                                                                                                     |
| <b>KLF5 – ChIP grade</b> | ActiveMotif      | 61099     |                       | <a href="https://www.activemotif.com/catalog/details/61099/klf5-antibody-pab">https://www.activemotif.com/catalog/details/61099/klf5-antibody-pab</a>                                                                                 |
| <b>FOXO1</b>             | CellSignaling    | 2880      | 1:1000                | <a href="https://www.cellsignal.com/products/primary-antibodies/foxo1-c29h4-rabbit-mab/2880">https://www.cellsignal.com/products/primary-antibodies/foxo1-c29h4-rabbit-mab/2880</a>                                                   |
| <b>pFOXO1 (S256)</b>     | CellSignaling    | 9461      | 1:1000                | <a href="https://www.cellsignal.com/products/primary-antibodies/phospho-foxo1-ser256-antibody/9461">https://www.cellsignal.com/products/primary-antibodies/phospho-foxo1-ser256-antibody/9461</a>                                     |
| <b>β-ACTIN</b>           | Santa Cruz       | SC-47778  | 1:200                 | <a href="https://www.scbt.com/p/beta-actin-antibody-c4?gclid=EAlaIqobChMIqr35qv_M6gIVRMDICh3c5qzxEAAYASAAEgLygPD_BwE">https://www.scbt.com/p/beta-actin-antibody-c4?gclid=EAlaIqobChMIqr35qv_M6gIVRMDICh3c5qzxEAAYASAAEgLygPD_BwE</a> |
| <b>PPARα</b>             | Santa Cruz       | SC-9000   | 1:200                 | <a href="https://www.scbt.com/p/pparalpha-antibody-h-98">https://www.scbt.com/p/pparalpha-antibody-h-98</a>                                                                                                                           |
| <b>AKT</b>               | CellSignaling    | 9272      | 1:1000                | <a href="https://www.cellsignal.com/products/primary-antibodies/akt-antibody/9272">https://www.cellsignal.com/products/primary-antibodies/akt-antibody/9272</a>                                                                       |
| <b>pAKT (S473)</b>       | CellSignaling    | 9271      | 1:1000                | <a href="https://www.cellsignal.com/products/primary-antibodies/phospho-akt-ser473-antibody/9271">https://www.cellsignal.com/products/primary-antibodies/phospho-akt-ser473-antibody/9271</a>                                         |
| <b>NOX4</b>              | Abcam            | ab109225  | 1:2000                | <a href="https://www.abcam.com/nadph-oxidase-4-antibody-uotr1b492-ab109225.html">https://www.abcam.com/nadph-oxidase-4-antibody-uotr1b492-ab109225.html</a>                                                                           |

|                           |                 |           |        |                                                                                                                                                                                                                                         |
|---------------------------|-----------------|-----------|--------|-----------------------------------------------------------------------------------------------------------------------------------------------------------------------------------------------------------------------------------------|
| <b>NOX2 (gp91-phox)</b>   | Santa Cruz      | SC-130543 | 1:200  | <a href="https://www.scbt.com/p/gp91-phox-antibody-54-1?gclid=EAlaIqObChMlpKeuzP_M6glVBY7ICh0xgQaoEAAYASAAEgLQgyD_BwE">https://www.scbt.com/p/gp91-phox-antibody-54-1?gclid=EAlaIqObChMlpKeuzP_M6glVBY7ICh0xgQaoEAAYASAAEgLQgyD_BwE</a> |
| <b>ATP5a</b>              | Abcam           | ab14748   | 1:1000 | <a href="https://www.abcam.com/atp5a-antibody-15h4c4-mitochondrial-marker-ab14748.html">https://www.abcam.com/atp5a-antibody-15h4c4-mitochondrial-marker-ab14748.html</a>                                                               |
| <b>VDAC1</b>              | Abcam           | ab15895   | 1:1000 | <a href="https://www.abcam.com/vdac1-porin-antibody-mitochondrial-loading-control-ab15895.html">https://www.abcam.com/vdac1-porin-antibody-mitochondrial-loading-control-ab15895.html</a>                                               |
| <b>IgG</b>                | Millipore Sigma | NI02      |        | <a href="https://www.emdmillipore.com/US/en/product/Normal-Goat-IgG,EMD_BIO-NI02">https://www.emdmillipore.com/US/en/product/Normal-Goat-IgG,EMD_BIO-NI02</a>                                                                           |
| <b>FOXO1 – ChIP grade</b> | Abcam           | ab39670   |        | <a href="https://www.abcam.com/foxo1a-antibody-chip-grade-ab39670.html">https://www.abcam.com/foxo1a-antibody-chip-grade-ab39670.html</a>                                                                                               |
| <b>A-TUBULIN</b>          | Santa Cruz      | sc-5286   | 1:200  | <a href="https://www.scbt.com/p/alpha-tubulin-antibody-b-7">https://www.scbt.com/p/alpha-tubulin-antibody-b-7</a>                                                                                                                       |
| <b>GAPDH</b>              | Santa Cruz      | Sc-25778  | 1:200  | <a href="https://www.scbt.com/p/gapdh-antibody-fl-335">https://www.scbt.com/p/gapdh-antibody-fl-335</a>                                                                                                                                 |
| <b>MEF2C</b>              | Abcam           | ab211493  | 1:1000 | <a href="https://www.abcam.com/mef2c-antibody-epr19089-202-chip-grade-ab211493.html">https://www.abcam.com/mef2c-antibody-epr19089-202-chip-grade-ab211493.html</a>                                                                     |
| <b>SREBP-1</b>            | Abcam           | ab28481   | 1:1000 | <a href="https://www.abcam.com/srebp1-antibody-ab28481.html">https://www.abcam.com/srebp1-antibody-ab28481.html</a>                                                                                                                     |
| <b>COUP-TFII</b>          | Cell Signaling  | 6434S     | 1:1000 | <a href="https://www.cellsignal.com/products/primary-antibodies/coup-tfii-d16c4-rabbit-mab/6434">https://www.cellsignal.com/products/primary-antibodies/coup-tfii-d16c4-rabbit-mab/6434</a>                                             |
| <b>UCP3</b>               | Abcam           | ab180643  | 1:1000 | <a href="https://www.abcam.com/ucp3-antibody-ab180643.html">https://www.abcam.com/ucp3-antibody-ab180643.html</a>                                                                                                                       |

**Cultured Cells**

| Name        | Vendor or Source         | Sex (F, M, or unknown) | Persistent ID / URL                                                                               |
|-------------|--------------------------|------------------------|---------------------------------------------------------------------------------------------------|
| <b>AC16</b> | Provided by Dr. Davidson |                        | <a href="https://pubmed.ncbi.nlm.nih.gov/15913645/">https://pubmed.ncbi.nlm.nih.gov/15913645/</a> |
|             |                          |                        |                                                                                                   |
|             |                          |                        |                                                                                                   |
